# Supplementary material
Source: PubMed Central journal article supplement (PMC9037110)
Supplement: NIHMS961553-supplement-SI.pdf [file NIHMS961553-supplement-SI.pdf]

## Electronic Supplementary Information (ESI)

# Direct visualization of sulfur cathodes: new insights into Li-S batteries via *operando* X-ray based methods

Seung-Ho Yu,<sup>‡ab</sup> Xin Huang,<sup>‡bc</sup> Kathleen Schwarz,<sup>d</sup> Rong Huang,<sup>b</sup> Tomás A. Arias,<sup>e</sup> Joel D. Brock,<sup>\*bc</sup> and Héctor D. Abruña<sup>\*a</sup>

<sup>a</sup>Department of Chemistry and Chemical Biology, Cornell University, Ithaca, New York 14853, USA

<sup>b</sup>Cornell High Energy Synchrotron Source, Cornell University, Ithaca, NY 14853, USA

<sup>c</sup>School of Applied and Engineering Physics, Cornell University, Ithaca, New York 14853, USA

<sup>d</sup>National Institute of Standards and Technology, Material Measurement Laboratory, 100 Bureau Dr, Gaithersburg MD, USA

<sup>e</sup>Department of Physics, Cornell University, Ithaca, New York 14853, USA

<sup>‡</sup>These authors equally contributed to this work.

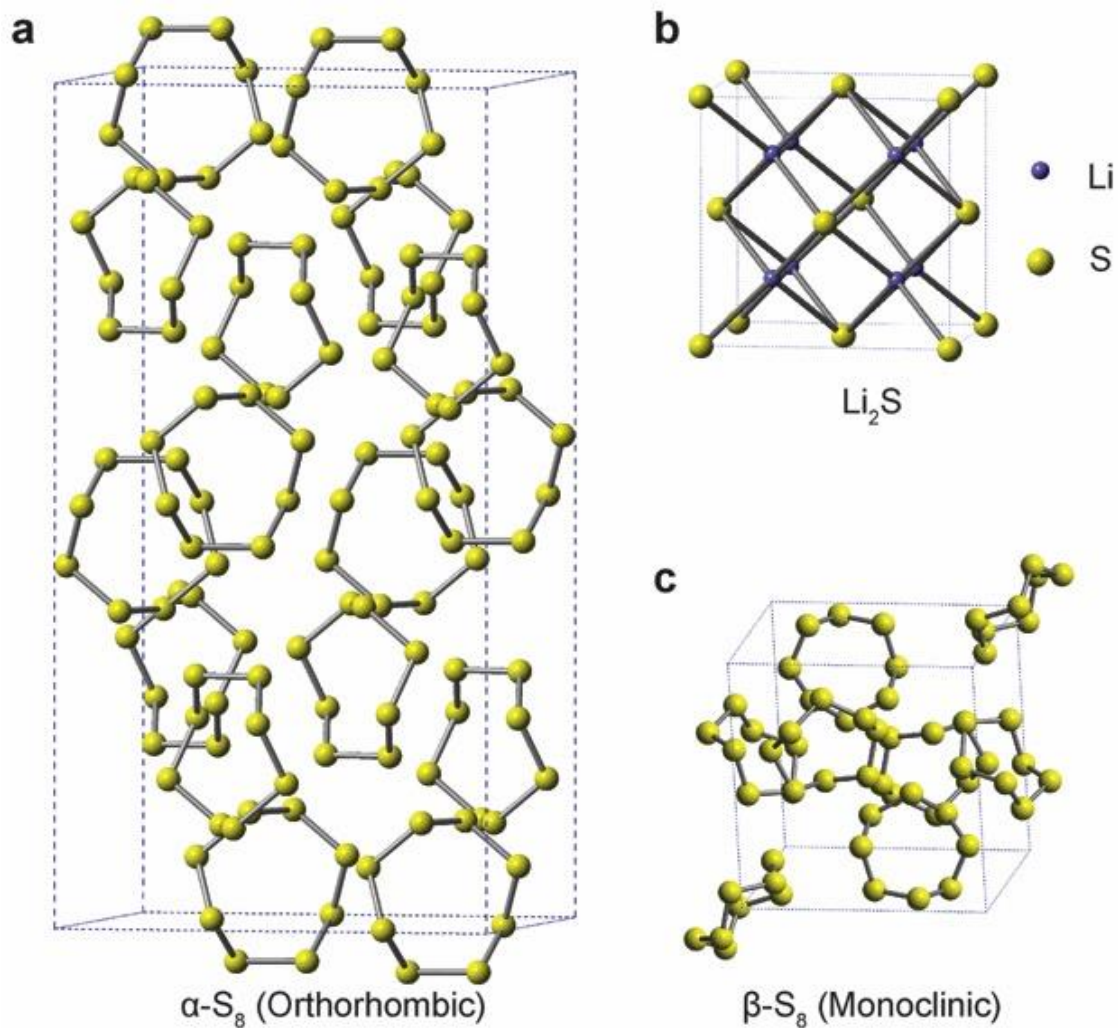

**Fig. S1** Unit cell structure of (a)  $\alpha$ -S<sub>8</sub>, (b) Li<sub>2</sub>S and (c)  $\beta$ -S<sub>8</sub>.

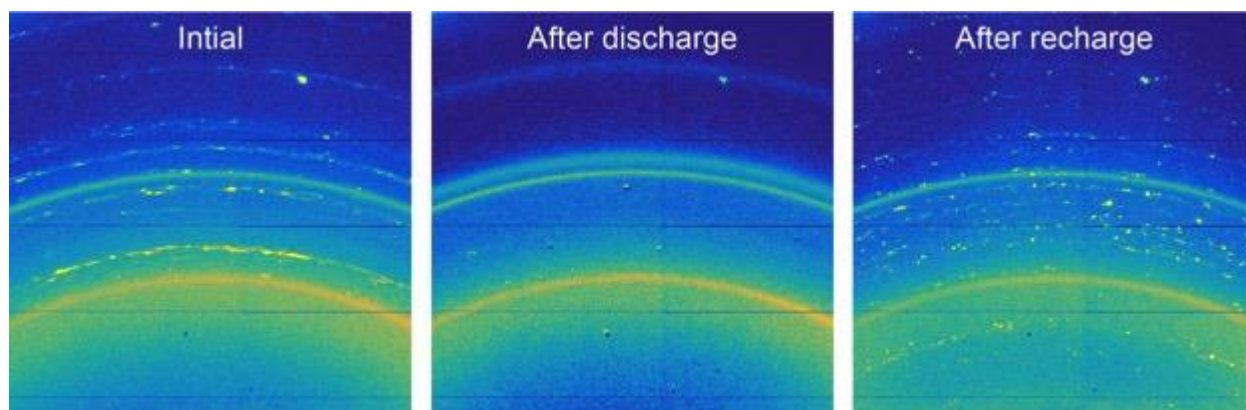

**Fig. S2** Diffraction patterns of Li-S battery (a) before discharge, (b) when fully discharged and (c) when fully recharged.

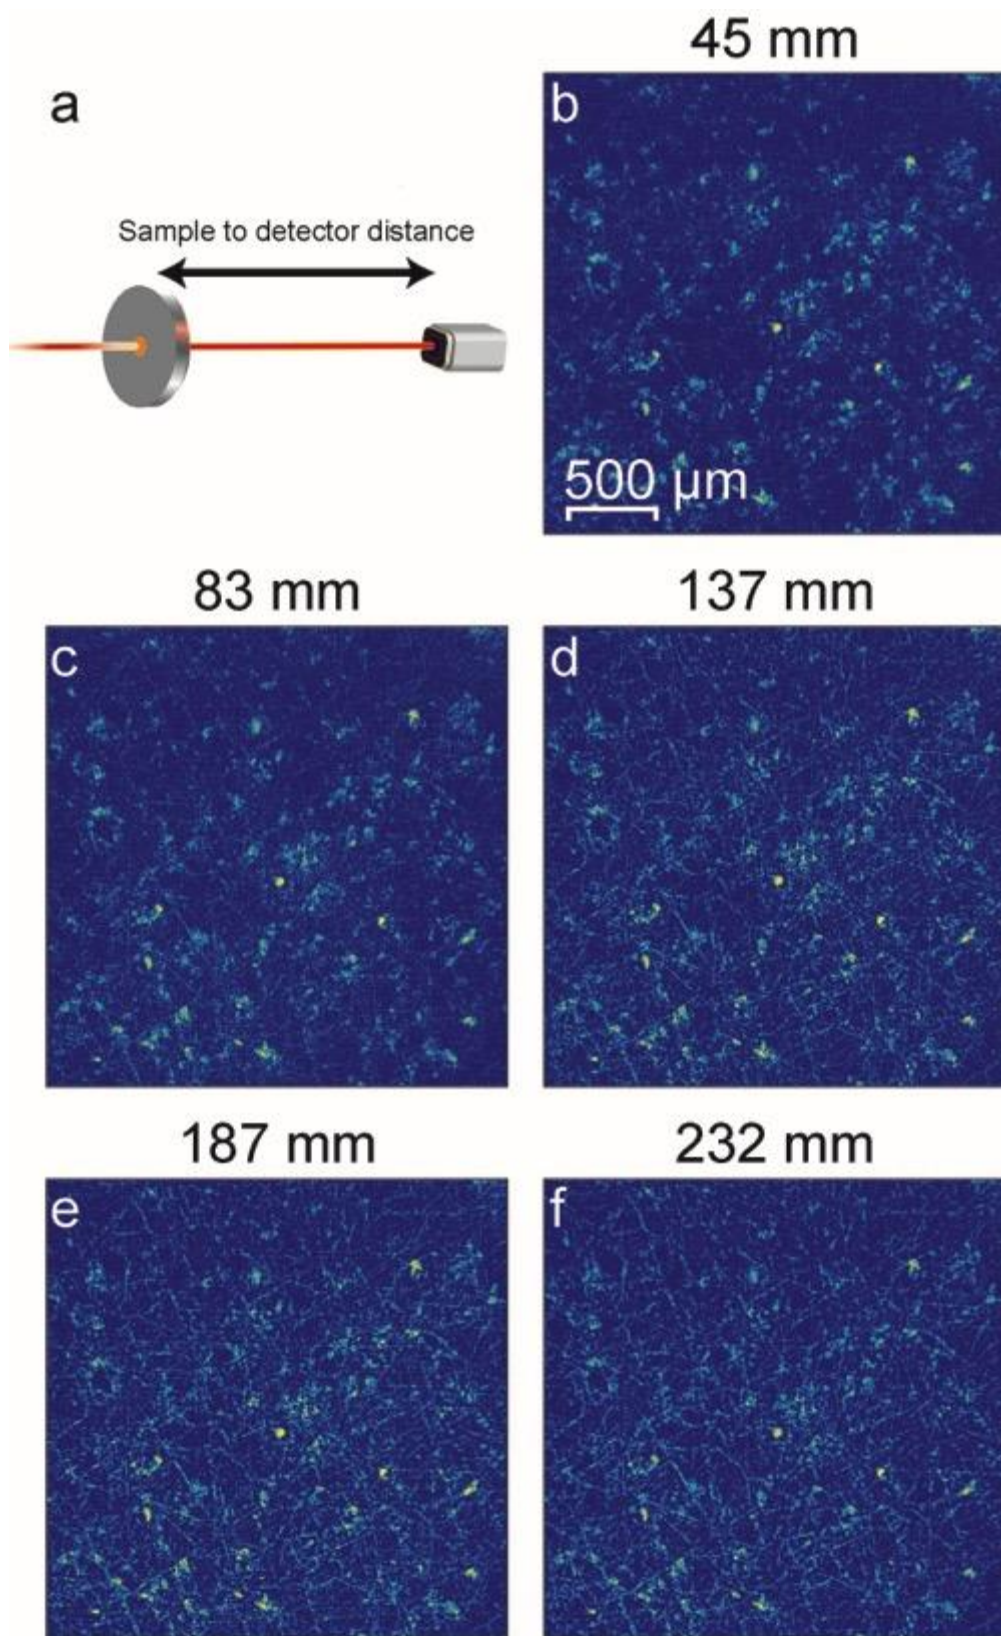

**Fig. S3** X-ray microscopy of sulfur electrode at different distances between the sample and detector.

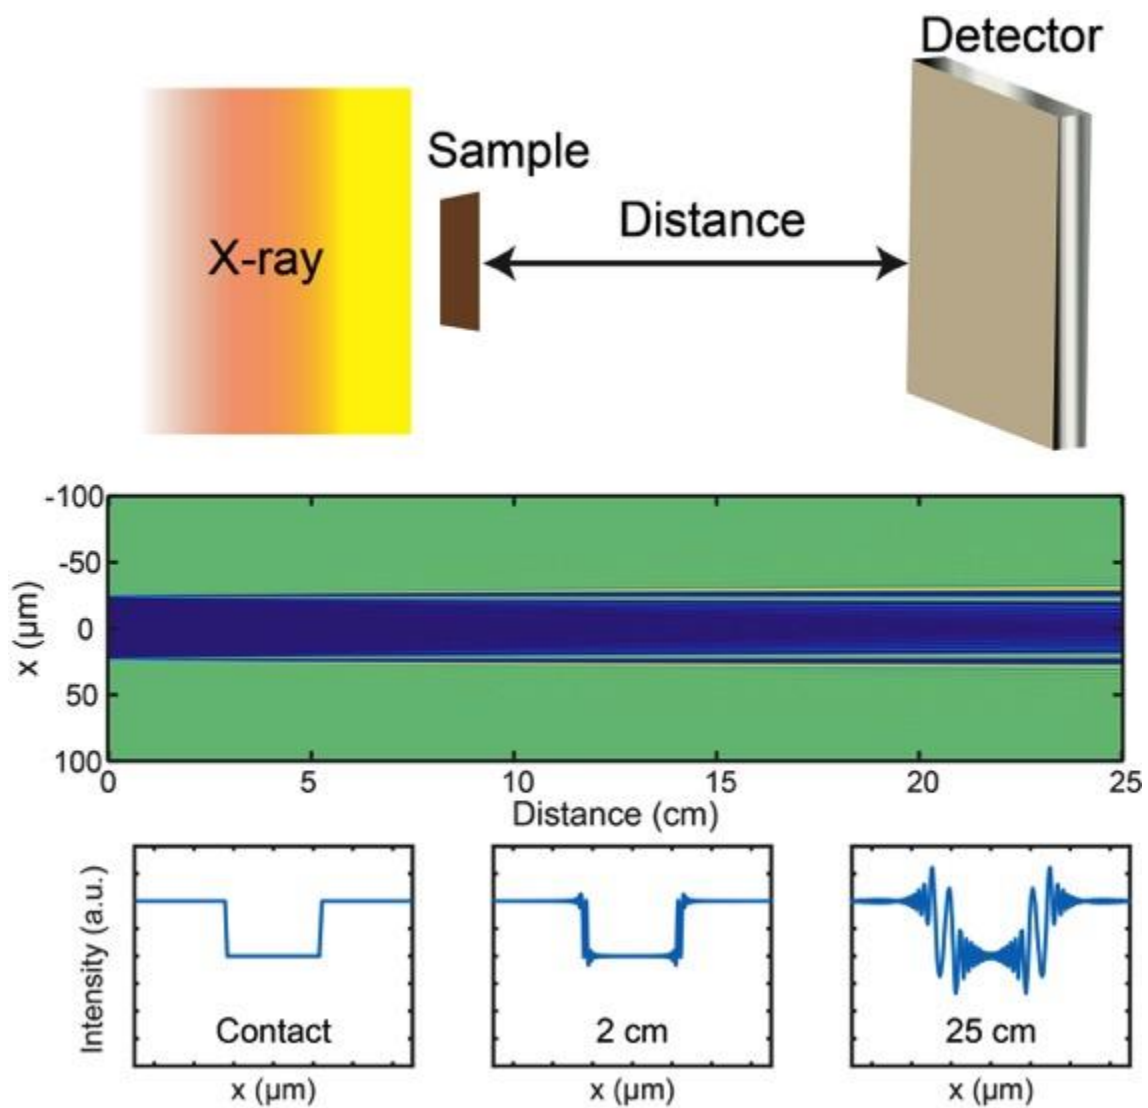

**Fig. S4** Scheme for the phase enhancement in XRM and simulated X-ray intensity changing with the distance between sample and detector.

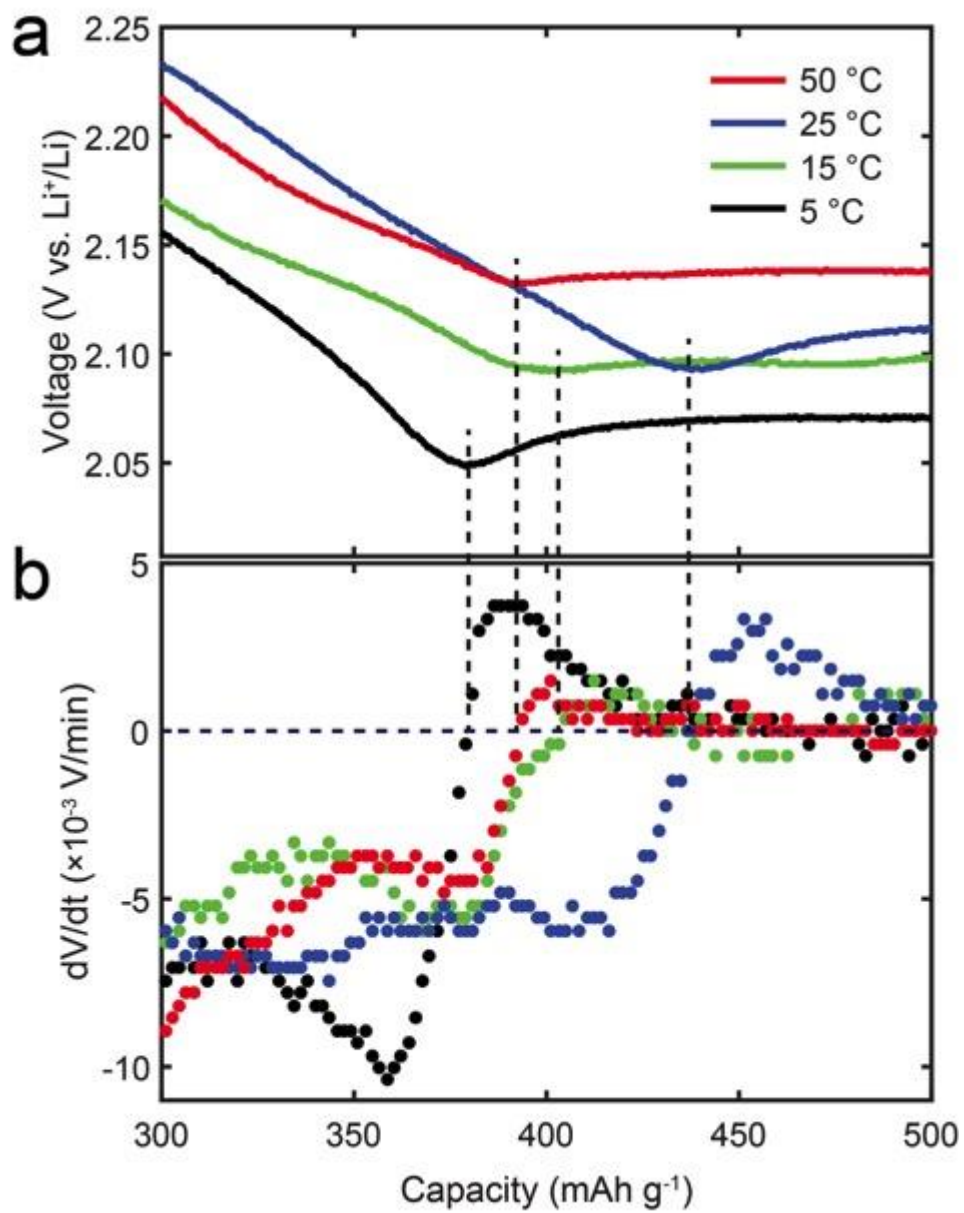

**Fig. S5** (a) Voltage profiles around the end of the upper plateau and (b) their first derivatives at different temperatures.

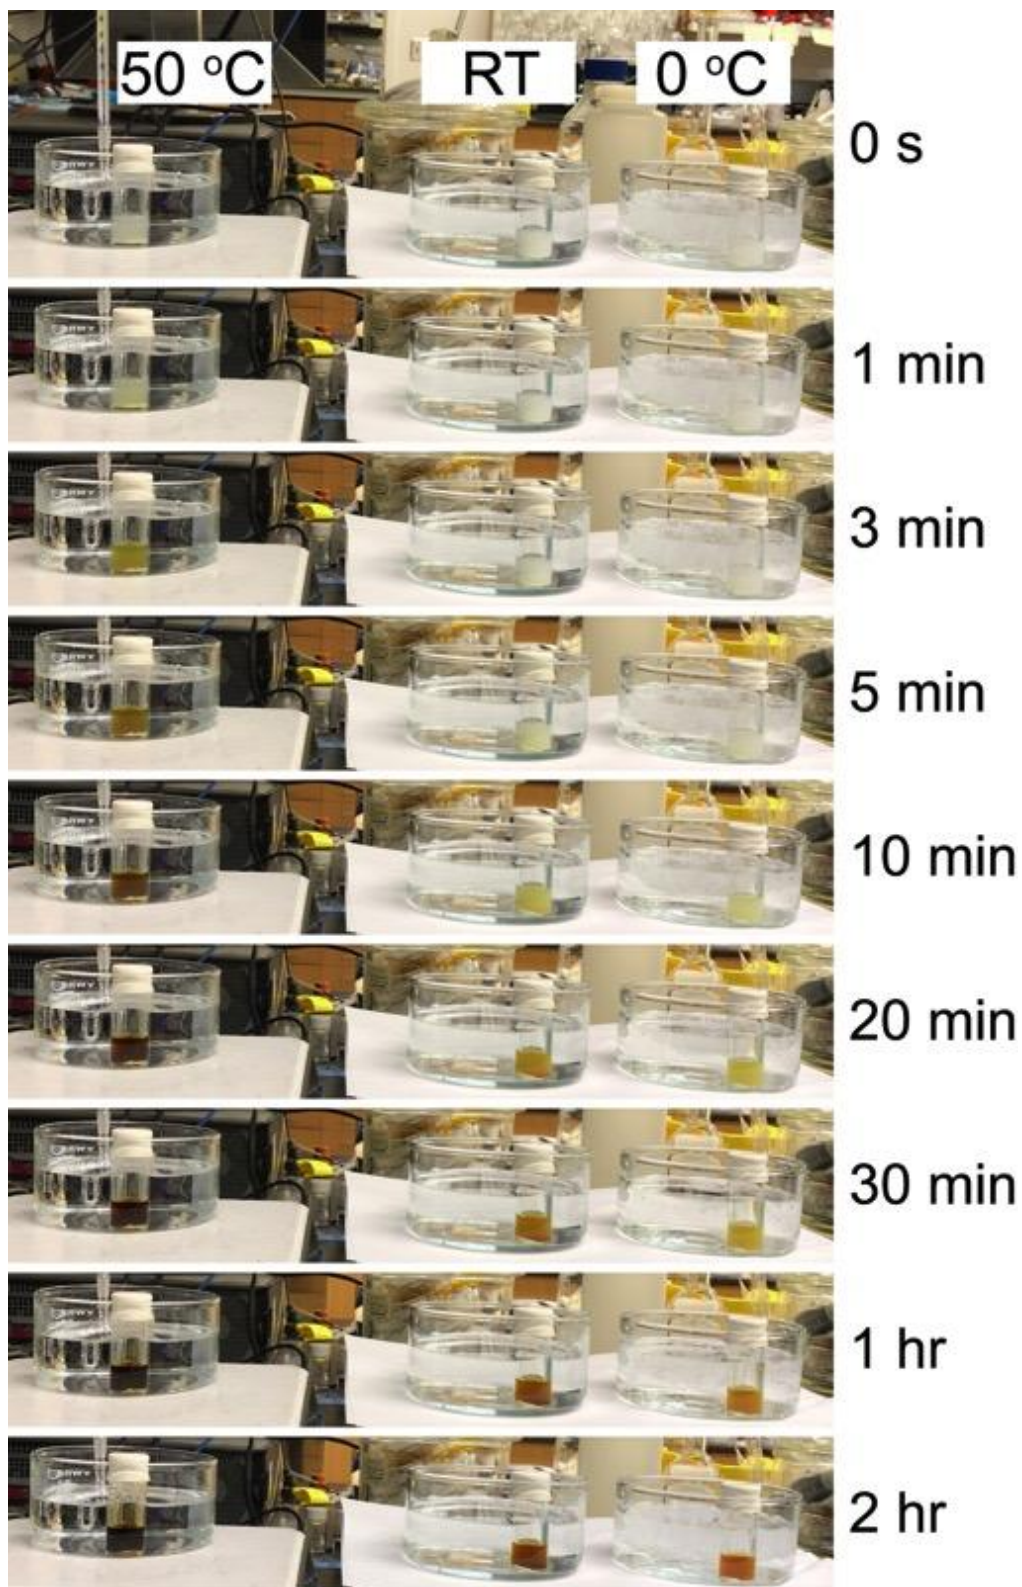

**Fig. S6** Photographs of dissolution of polysulfide at different temperatures (50 °C, RT and 0 °C).

As shown in the enclosed photos (Fig. S6), we prepared three vials at different temperatures (50 °C, RT~25 °C, and 0 °C), having the same amount of homogeneously mixed S and Li<sub>2</sub>S (7:1 in molar ratio). We then injected the same amount of electrolyte (which corresponded to 2 M if all of the material were completely dissolved) into the vials. When the electrolyte was injected into the S and Li<sub>2</sub>S mixtures, the initial color was white (slightly yellowish) at all temperatures. The sample at 50 °C quickly changed in color, initially turning yellow (after 1 min), and then completely to red (after 10 min). Meanwhile, the other two samples (at RT and 0 °C) just turned yellow after 10 min. These experiments indicate that polysulfides dissolve faster at higher temperatures. In addition, considering that the temperature gaps between samples were equal (25°), but the color difference between 50 °C and RT was much more dramatic than that between RT and 0 °C, suggests that the effects of temperature on the dissolution of polysulfides is not linear; becoming much stronger at 50 °C. This, at least in part, explains why only the  $\alpha$ -S<sub>8</sub> XRD peak at 50 °C decreased much faster than at the other temperatures.

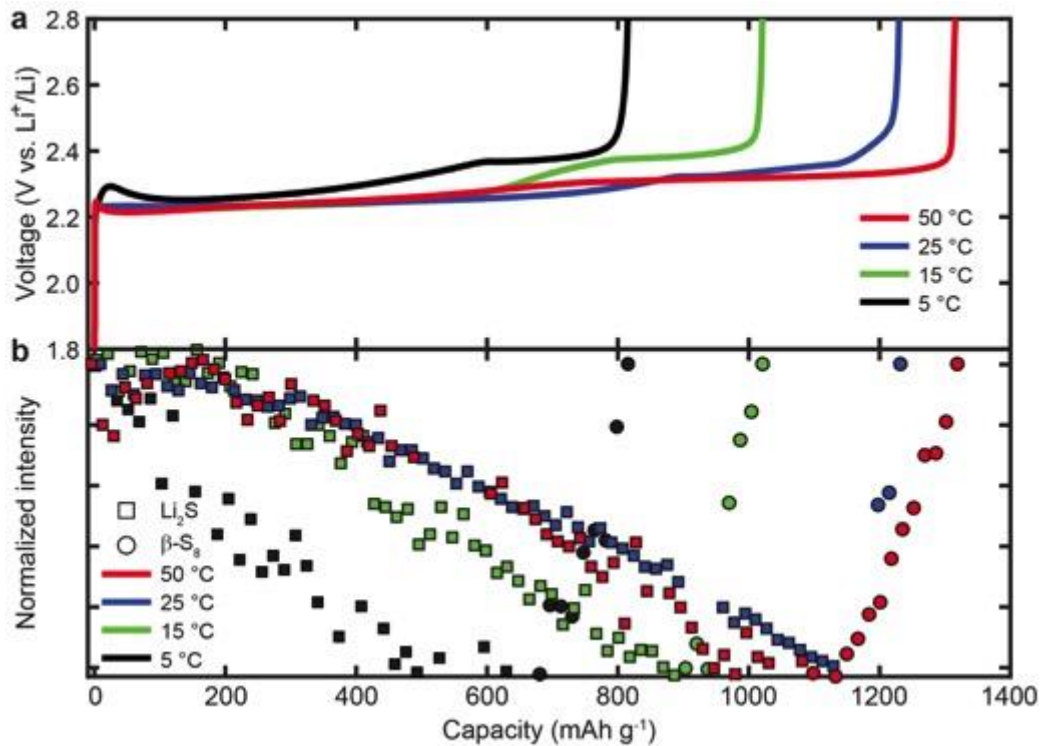

**Fig. S7** Voltage profile and normalized intensity of X-ray diffraction from  $\text{Li}_2\text{S}$  and  $\beta\text{-S}_8$  of sulfur electrodes at a rate of 0.2 C during charge at different temperatures.

Fig. S7 shows the voltage profile and the integrated intensity of X-ray diffraction of  $\text{Li}_2\text{S}$  and  $\beta\text{-S}_8$  during the (re)charge. Independent of temperature, the  $\beta\text{-S}_8$  is all formed around the end of the charge, even at 50 °C, and the intensity of  $\beta\text{-S}_8$  increased linearly. Similar to the discharging process, the overpotential increased as the temperature decreased.



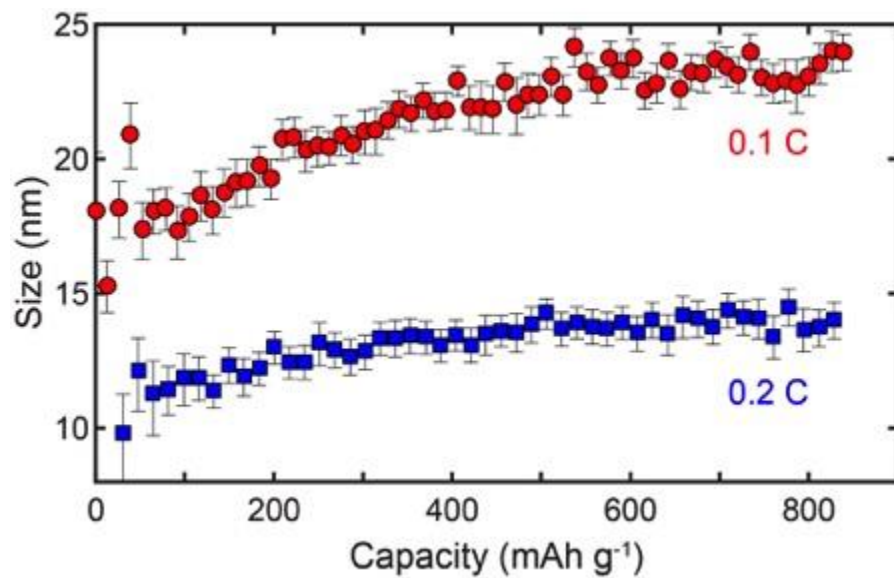

**Fig. S8** Particle size of  $\text{Li}_2\text{S}$  calculated from the  $\text{Li}_2\text{S}$  (111) Bragg peak at 0.1 C and 0.2 C at 25 °C.

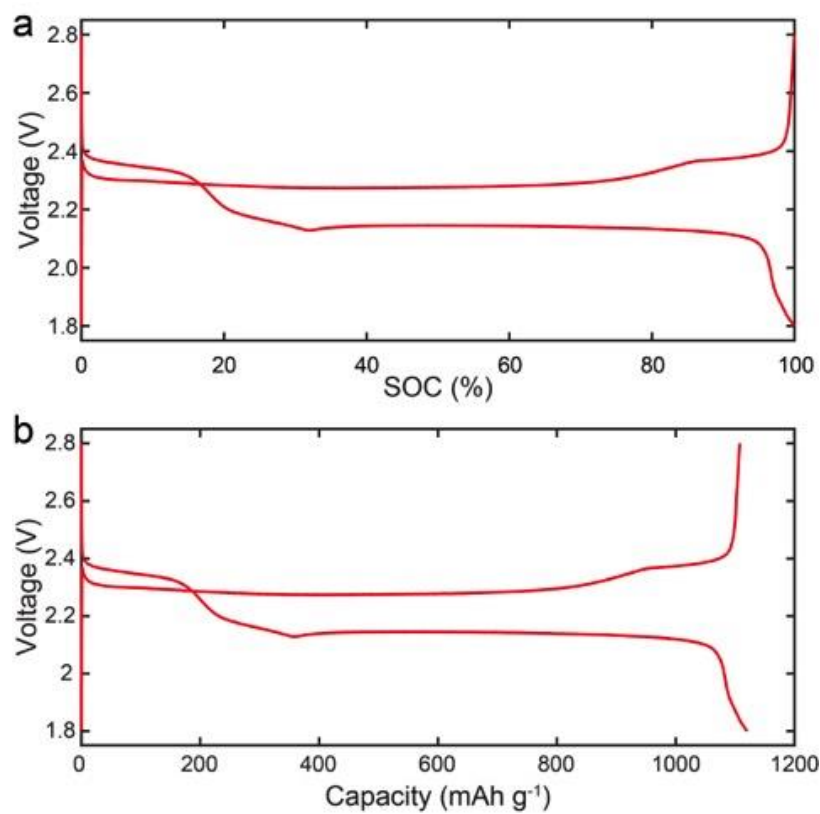

**Fig. S9** Voltage profile of the sulfur cathode at the second cycle, as a function of (a) state of charge and (b) specific capacity.

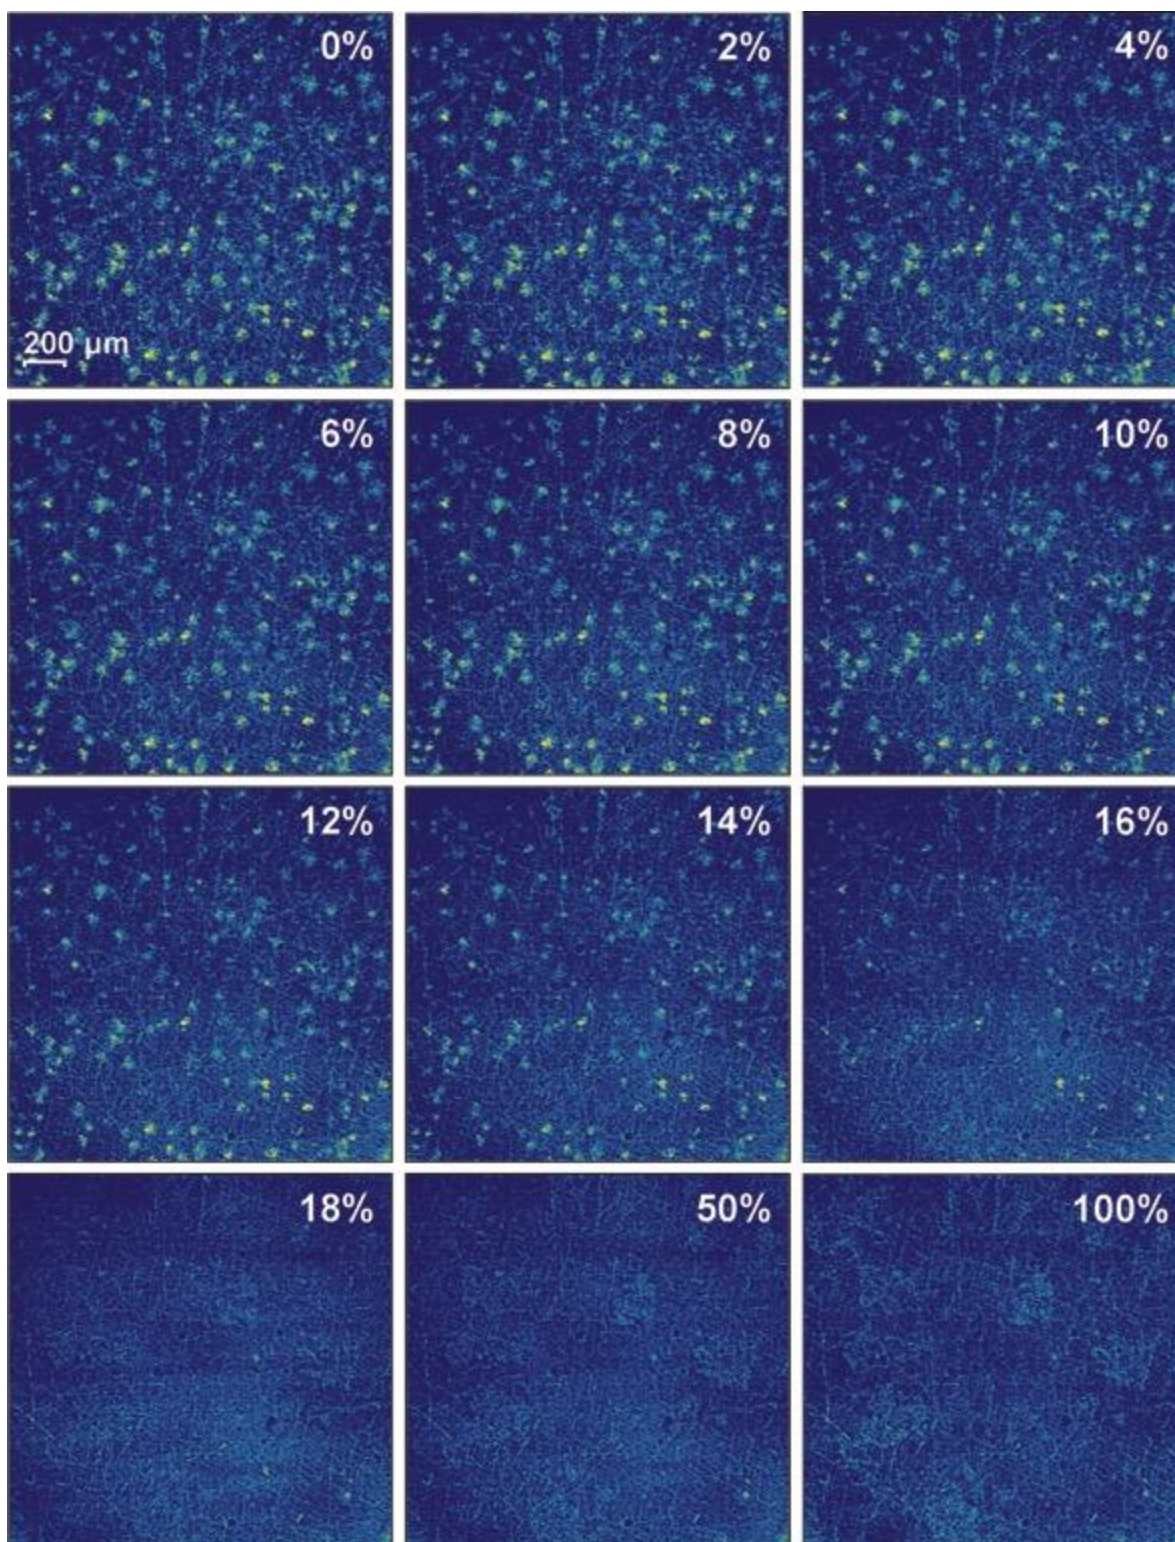

**Fig. S10** *Operando* X-ray microscopy images of sulfur electrode at different DODs during the second discharge.

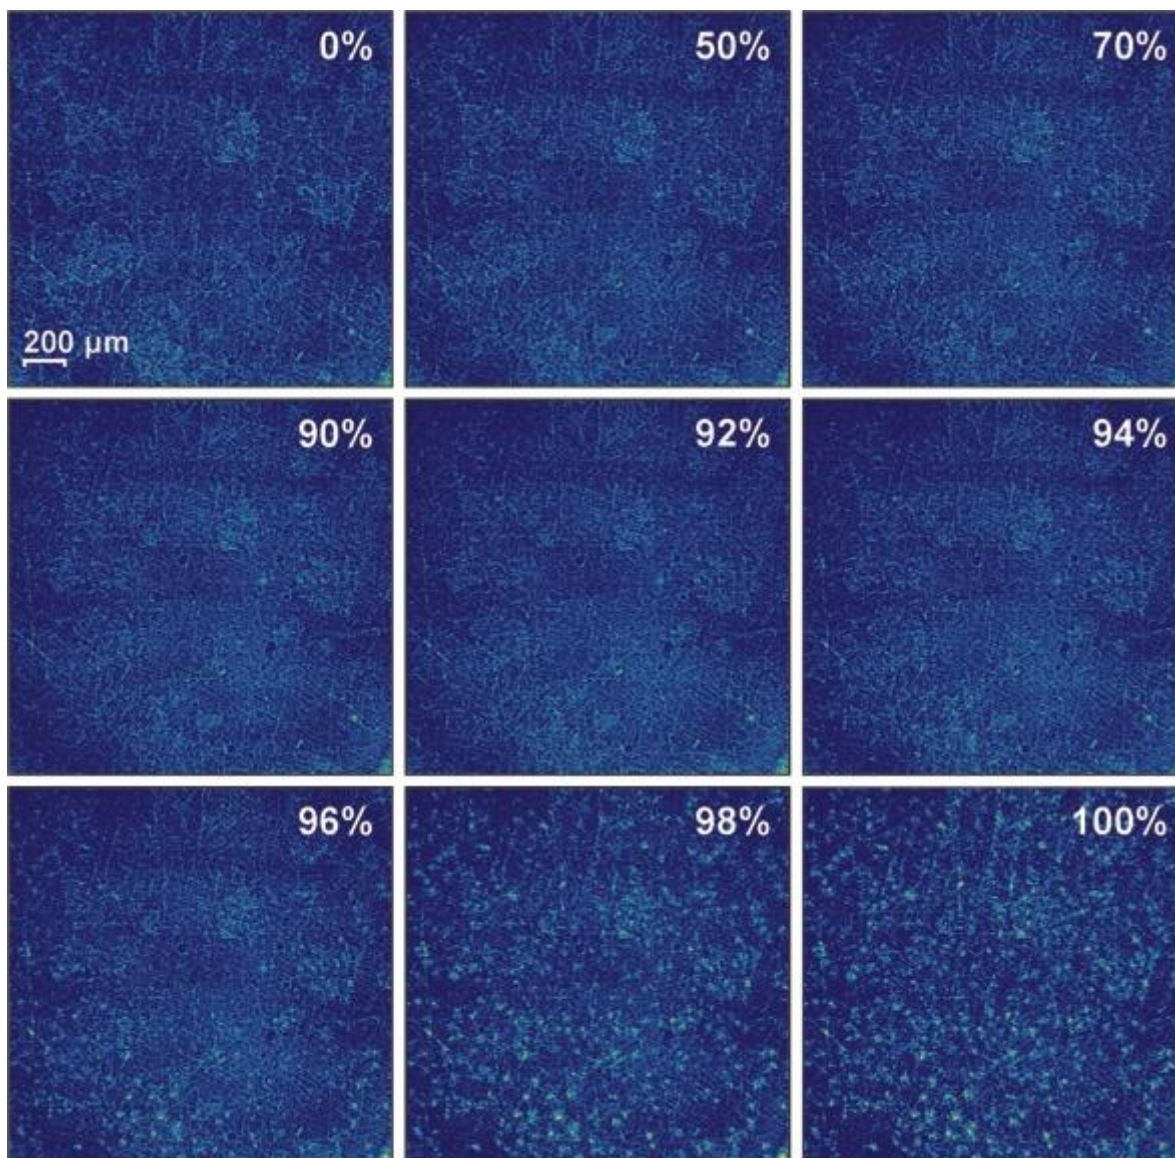

**Fig. S11** *Operando* X-ray microscopy images of sulfur electrode at different DODs during the second charge.

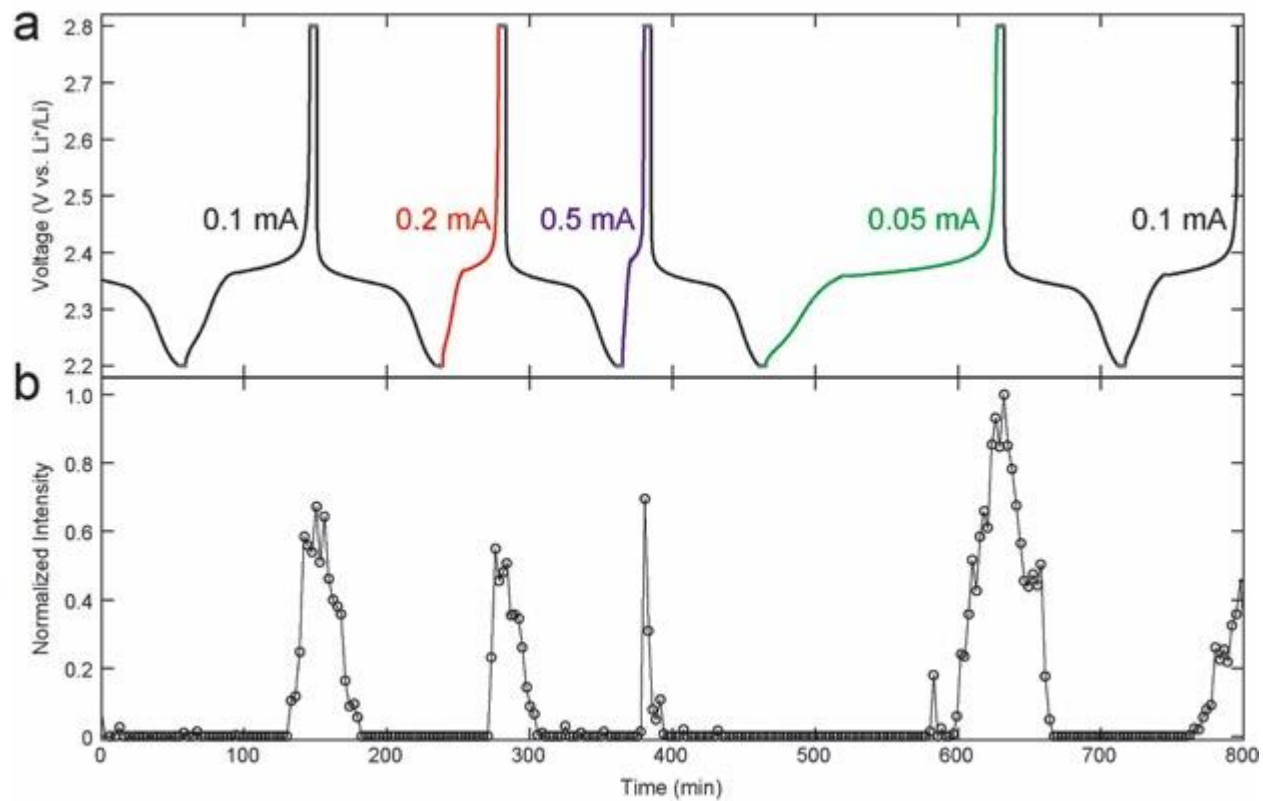

**Fig. S12** (a) Voltage profile and (b) normalized intensity of X-ray diffraction of  $\beta$ -S<sub>8</sub> in a lithium/polysulfide battery. The discharge rate was fixed at 0.1 mA, and charging rates were varied from 0.05 to 0.5 mA.

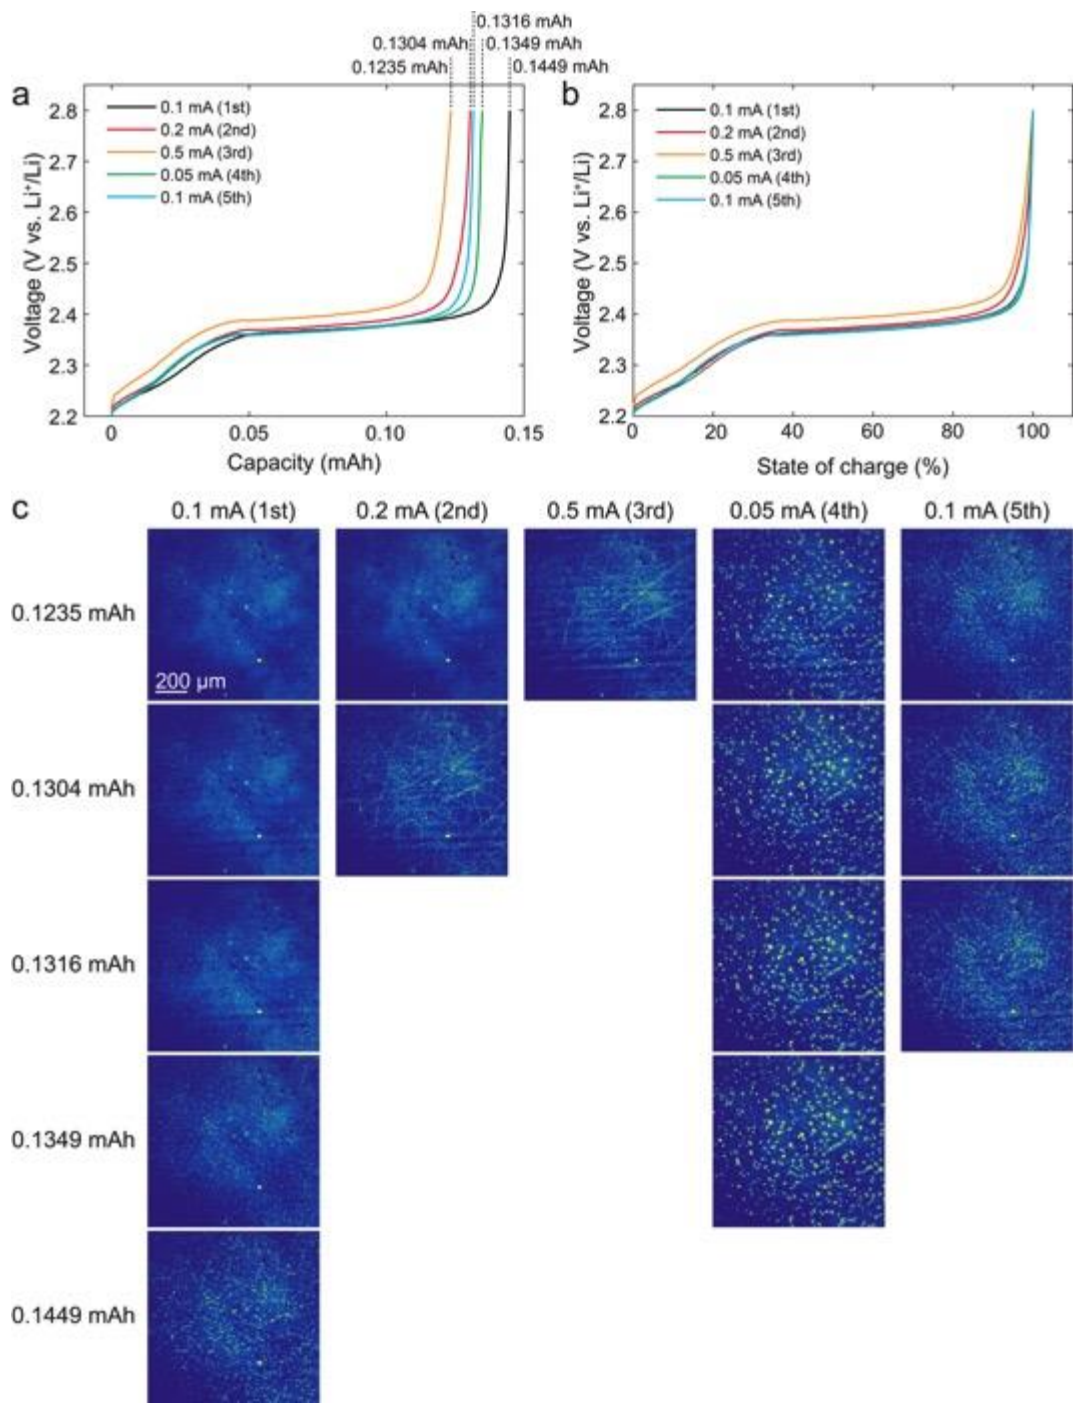

**Fig. S13** (a) Voltage versus capacity, (b) voltage versus SOC and (c) the XRM images of cathode of a lithium/polysulfide battery at different capacity.

|                            | Initial | After 1 <sup>st</sup> cycle | After 2 <sup>nd</sup> cycle |
|----------------------------|---------|-----------------------------|-----------------------------|
| <100 $\mu\text{m}^2$       | 42.3%   | 43.6%                       | 62.2%                       |
| 100 - 1000 $\mu\text{m}^2$ | 49.5%   | 52.5%                       | 37.4%                       |
| > 1000 $\mu\text{m}^2$     | 8.2%    | 3.9%                        | 0.4%                        |

**Table S1** Percentage of sulfur cluster area for the before cycle and after the 1<sup>st</sup> cycle and after 2<sup>nd</sup> cycle.
